# Supplementary material for: Nano polypropylenimine dendrimer (DAB-PPI-G1): as a novel nano basic-polymer catalyst for one-pot synthesis of 2-amino-2-chromene derivatives
Source: Royal Society of Chemistry journal article supplement (doi:10.1039/c5ra04458h), 2015-01-01
Supplement: c5ra04458h1.pdf [file c5ra04458h1.pdf]

## Supplementary Information

### Nano polypropylenimine dendrimer (DAB-PPI-G<sub>1</sub>): as a novel nano basic-polymer catalyst for one-pot synthesis of 2-amino-2-chromene derivatives

Behrooz Maleki\*, Safoora Sheikh

<sup>a</sup>Department of Chemistry, Hakim Sabzevari University, Sabzevar 96179-76487, Iran

\*Corresponding author; Tel: +985144013324; Fax: +9844010300

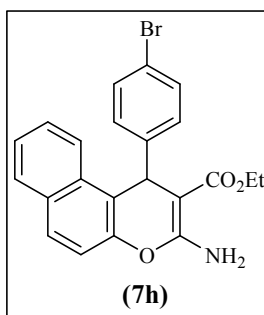

#### Ethyl-3-amino-1-(4-bromo phenyl)-1H-benzo[f]chromene-2-carboxylate (7h):

White solid, m.p 204-206°C; IR (KBr, cm<sup>-1</sup>): 3328, 3463, 3082, 2977, 1670, 1635, 1504, 1222, 1072; <sup>1</sup>H NMR (300 MHz, CDCl<sub>3</sub>) δ ppm: 1.19 (t, 3H, CH<sub>3</sub>), 4.67 (m, 2H, CH<sub>2</sub>), 5.35 (s, 1H, CH), 6.13 (br, 2H, NH<sub>2</sub>, D<sub>2</sub>O exchangeable), 7.19-7.76 (m, 10H); <sup>13</sup>C NMR (75 MHz, CDCl<sub>3</sub>) δ ppm: 14.6, 36.7, 59.7, 79.8, 116.7, 118.5, 119.8, 123.3, 124.9, 127.0, 128.6, 129.0, 130.0, 130.8, 131.2, 131.3, 145.5, 147.0, 159.9, 169.0; *Anal.* Calcd for C<sub>22</sub>H<sub>18</sub>BrNO<sub>3</sub>: C, 62.25; H, 4.27; N, 3.30. Found: C, 62.13; H, 4.35; N, 3.18.

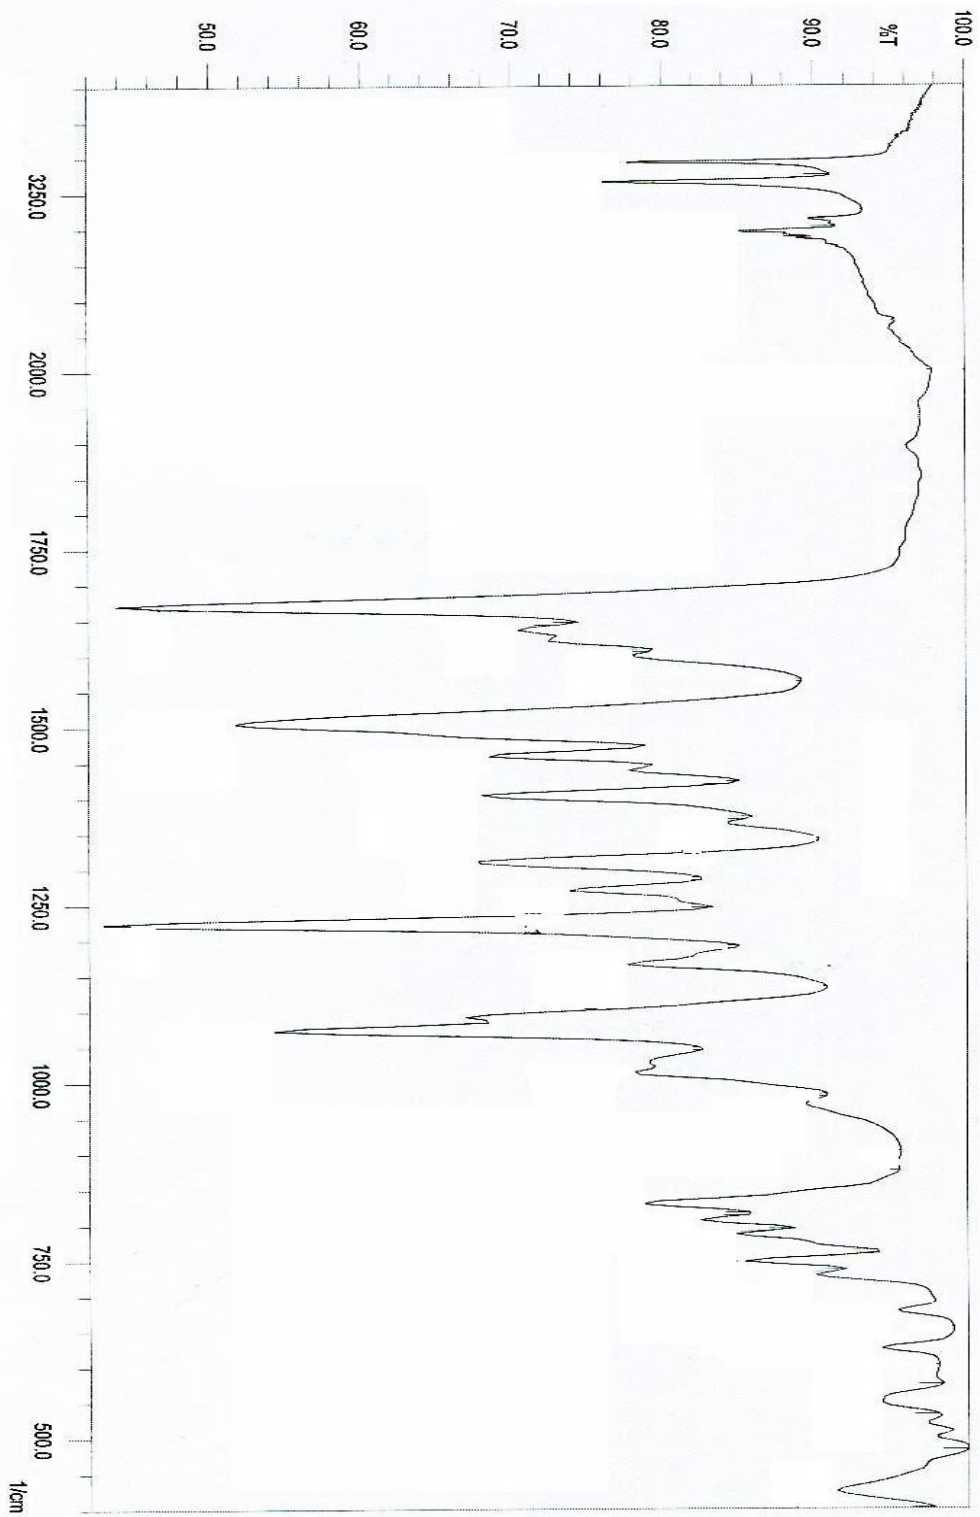

Figure S1. FT-IR spectrum of 7h

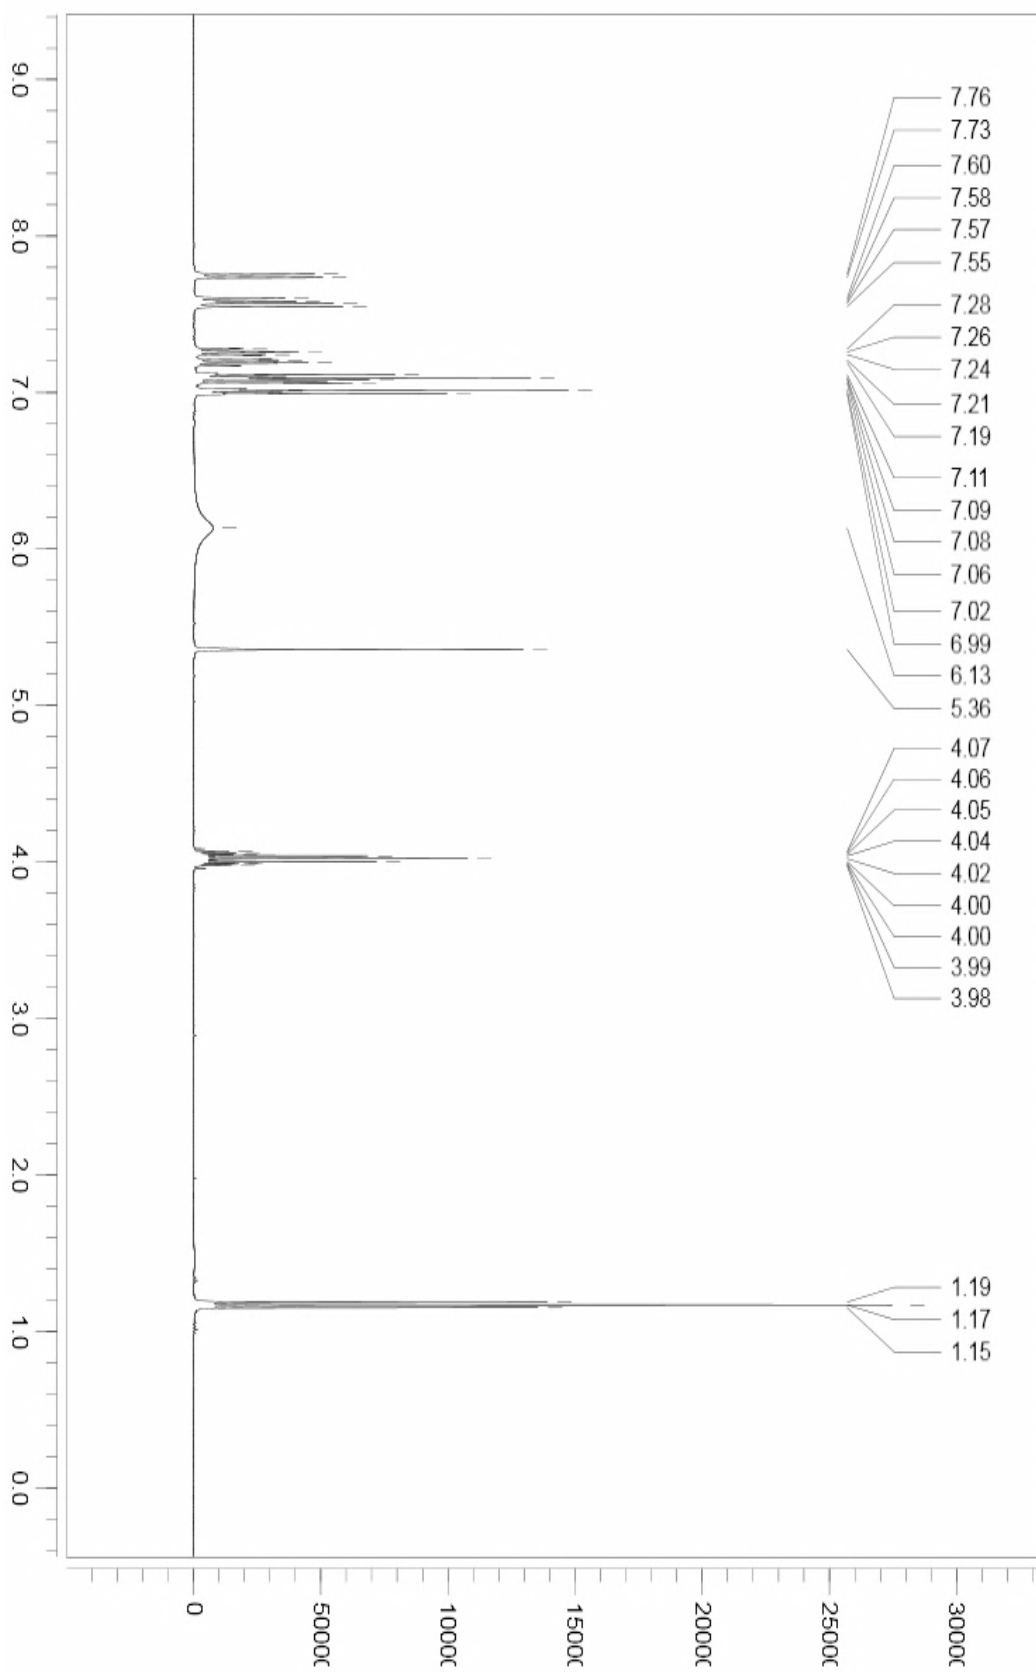

**Figure S2.** <sup>1</sup>H-NMR spectrum of **7h**

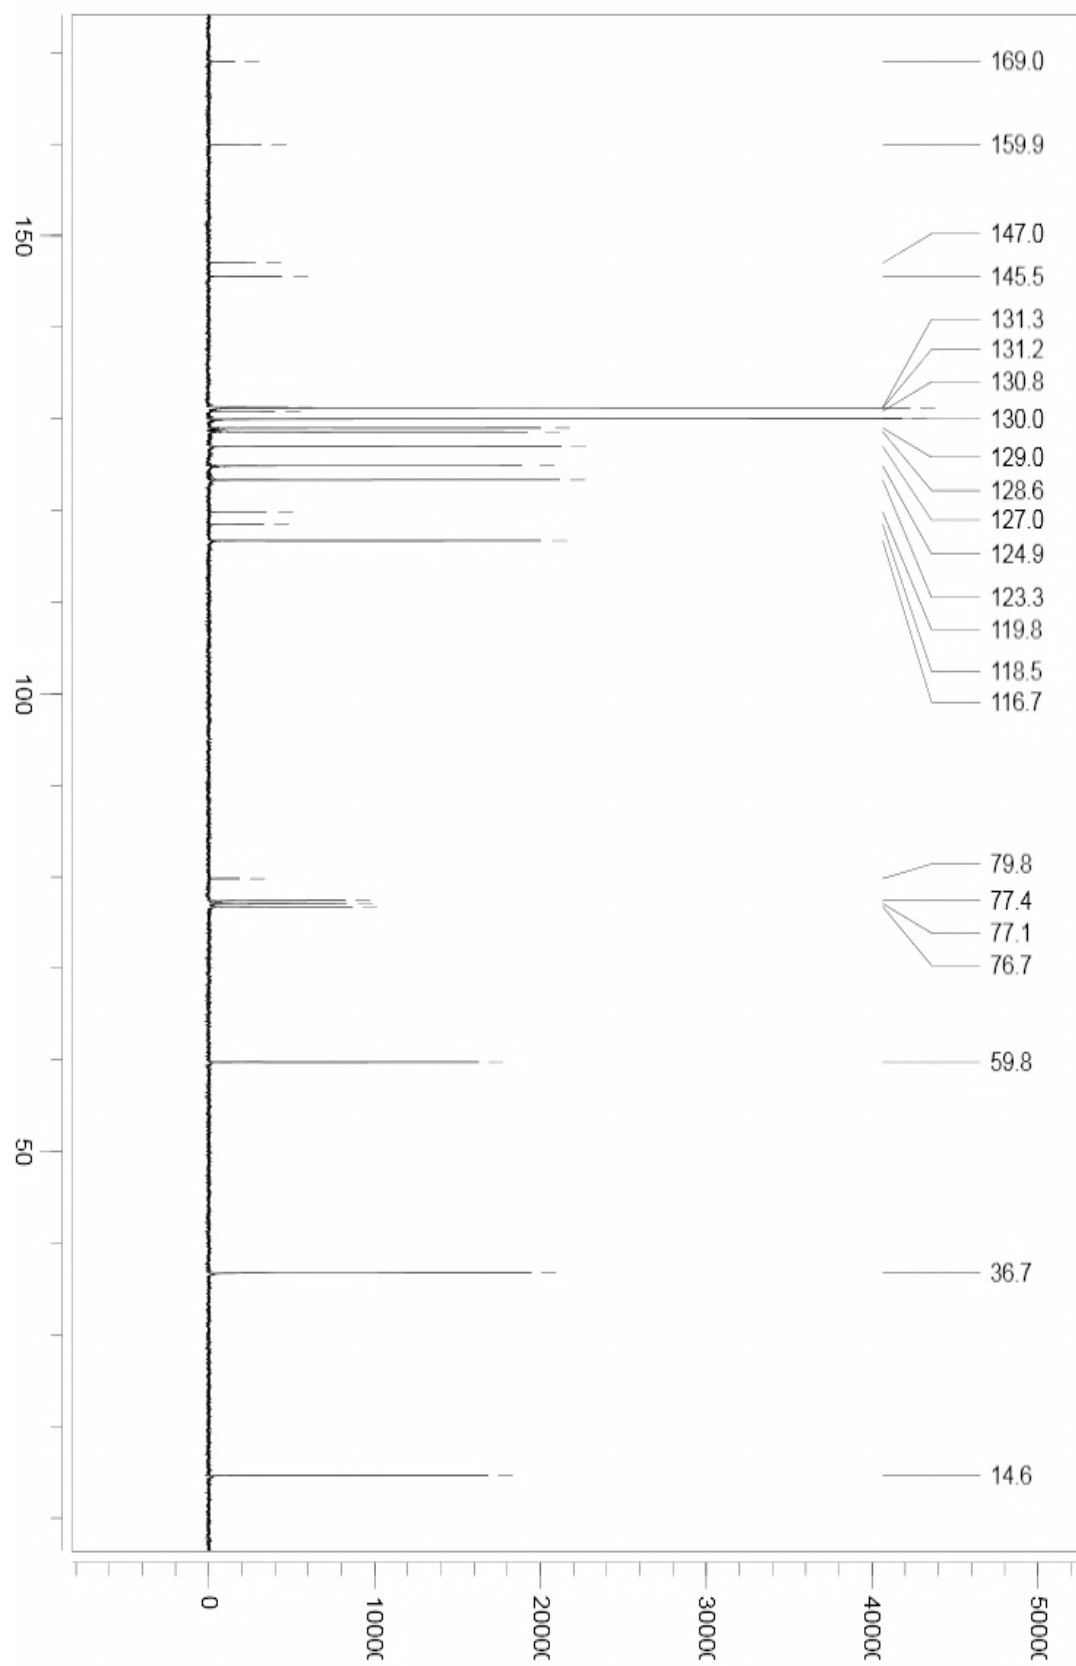

**Figure S3.**  $^{13}\text{C}$ -NMR spectrum of **7h**

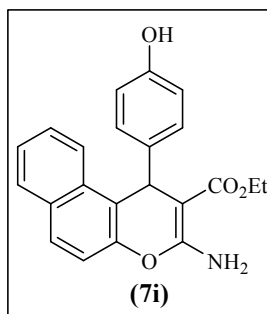

**Ethyl-3-amino-1-(4-hydroxy phenyl)-1H-benzo[f]chromene-2-carboxylate (8i):**

White solid, m.p 129-130°C; IR (KBr,  $\text{cm}^{-1}$ ): 3332, 3463, 3062, 2981, 1662, 1593, 1512, 1222, 1076; 1222;  $^1\text{H}$  NMR (300 MHz,  $\text{CDCl}_3$ )  $\delta$  ppm: 1.39 (t, 3H,  $\text{CH}_3$ ), 4.24 (m, 2H,  $\text{CH}_2$ ), 5.62 (s, 1H, CH), 6.33 (br, 2H,  $\text{NH}_2$ ,  $\text{D}_2\text{O}$  exchangeable), 7.05-7.89 (m, 10H), 10.21 (s, 1H, OH);  $^{13}\text{C}$  NMR (75 MHz,  $\text{CDCl}_3$ )  $\delta$  ppm: 14.6, 36.7, 59.7, 79.9, 116.7, 118.5, 123.3, 124.8, 127.0, 128.2, 128.6, 129.0, 129.5, 130.9, 131.3, 131.7, 145.0, 147.0, 159.9, 169.0; *Anal.* Calcd for  $\text{C}_{22}\text{H}_{19}\text{NO}_4$ : C, 73.10; H, 5.30; N, 3.87. Found: C, 72.95; H, 5.46; N, 3.79.

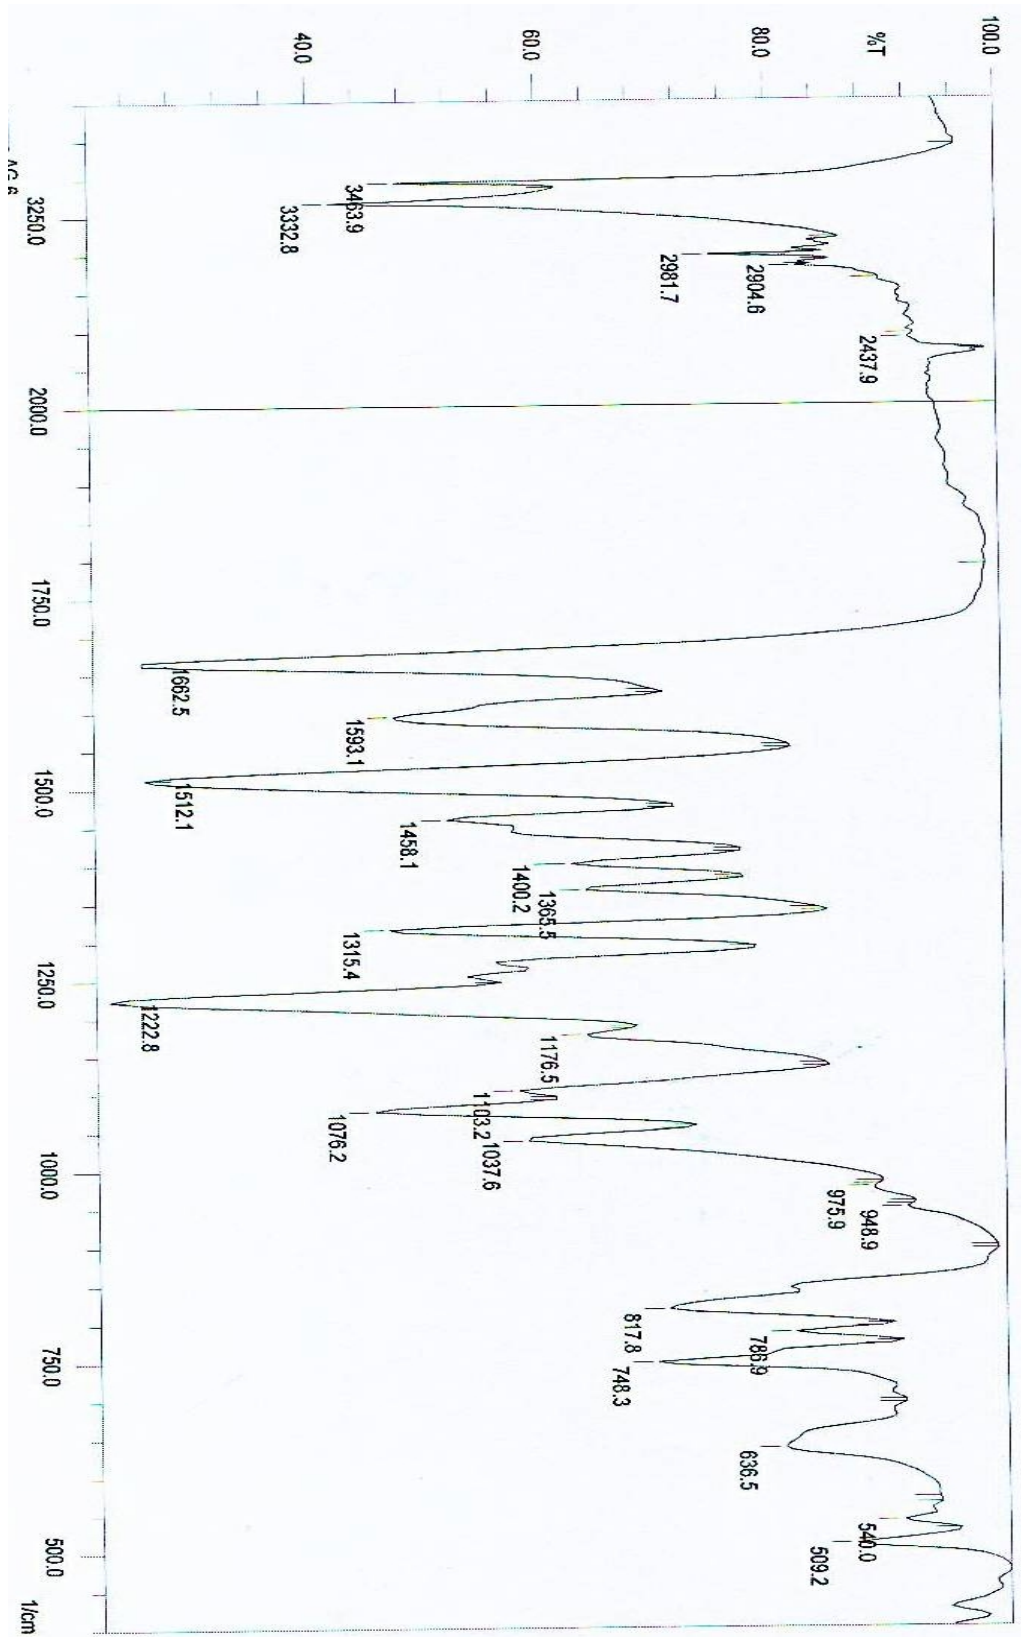

Figure S4. FT-IR spectrum of 7i

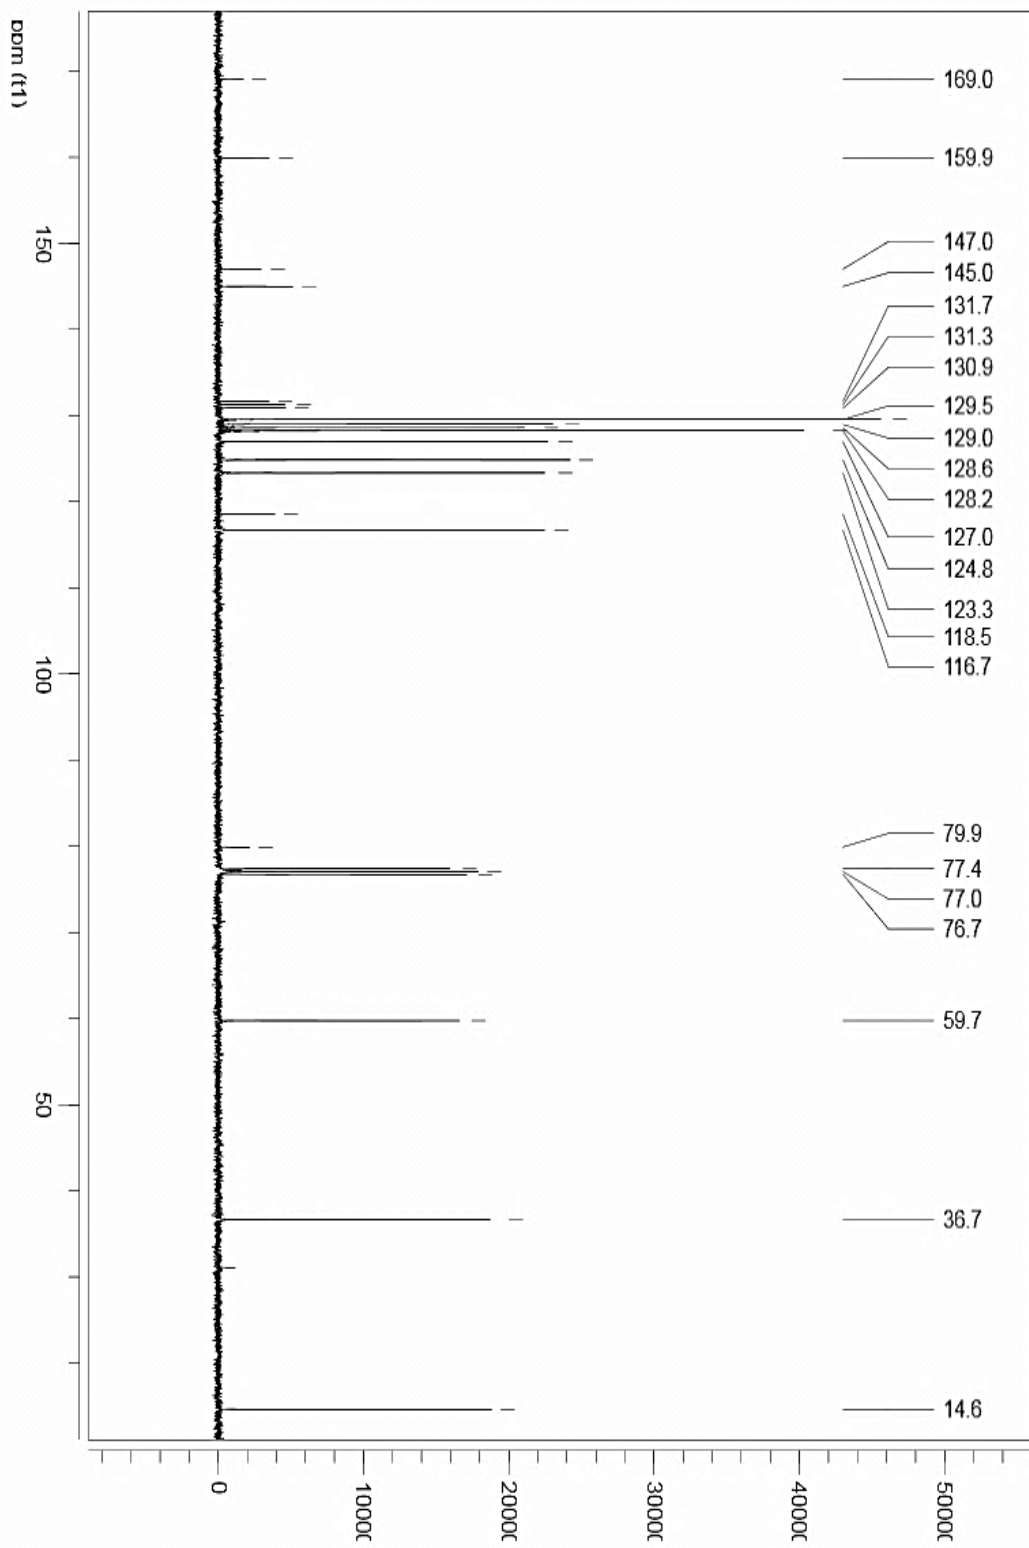

Figure S5.  $^{13}\text{C}$ -NMR spectrum of **7i**

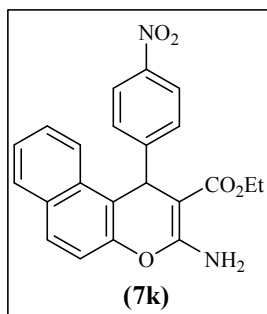

**Ethyl-3-amino-1-(4-nitro phenyl)-1H-benzo[f]chromene-2-carboxylate (7k):**

Yellow solid, m.p 180-182 °C. IR (KBr,  $\text{cm}^{-1}$ ): 3301, 3448, 3070, 2990, 1678, 1639, 1515, 1390, 1224, 1072;  $^1\text{H}$  NMR (300 MHz,  $\text{CDCl}_3$ )  $\delta$  ppm: 1.39 (t, 3H,  $\text{CH}_3$ ), 4.25 (m, 2H,  $\text{CH}_2$ ), 5.71 (s, 1H, CH), 6.44 (br, 2H,  $\text{NH}_2$ ,  $\text{D}_2\text{O}$  exchangeable); 7.08-8.06 (m, 10H);  $^{13}\text{C}$  NMR (75 MHz,  $\text{CDCl}_3$ )  $\delta$  ppm: 14.6, 37.2, 59.9, 78.9, 116.7, 117.5, 123.0, 123.6, 125.1, 127.2, 128.8, 129.0, 129.5, 130.7, 131.3, 146.2, 147.1, 153.8, 160.0, 168.7; *Anal.* Calcd for  $\text{C}_{22}\text{H}_{18}\text{N}_2\text{O}_5$ : C, 67.66; H, 4.65; N, 7.18. Found: C, 67.57; H, 4.81; N, 7.02.



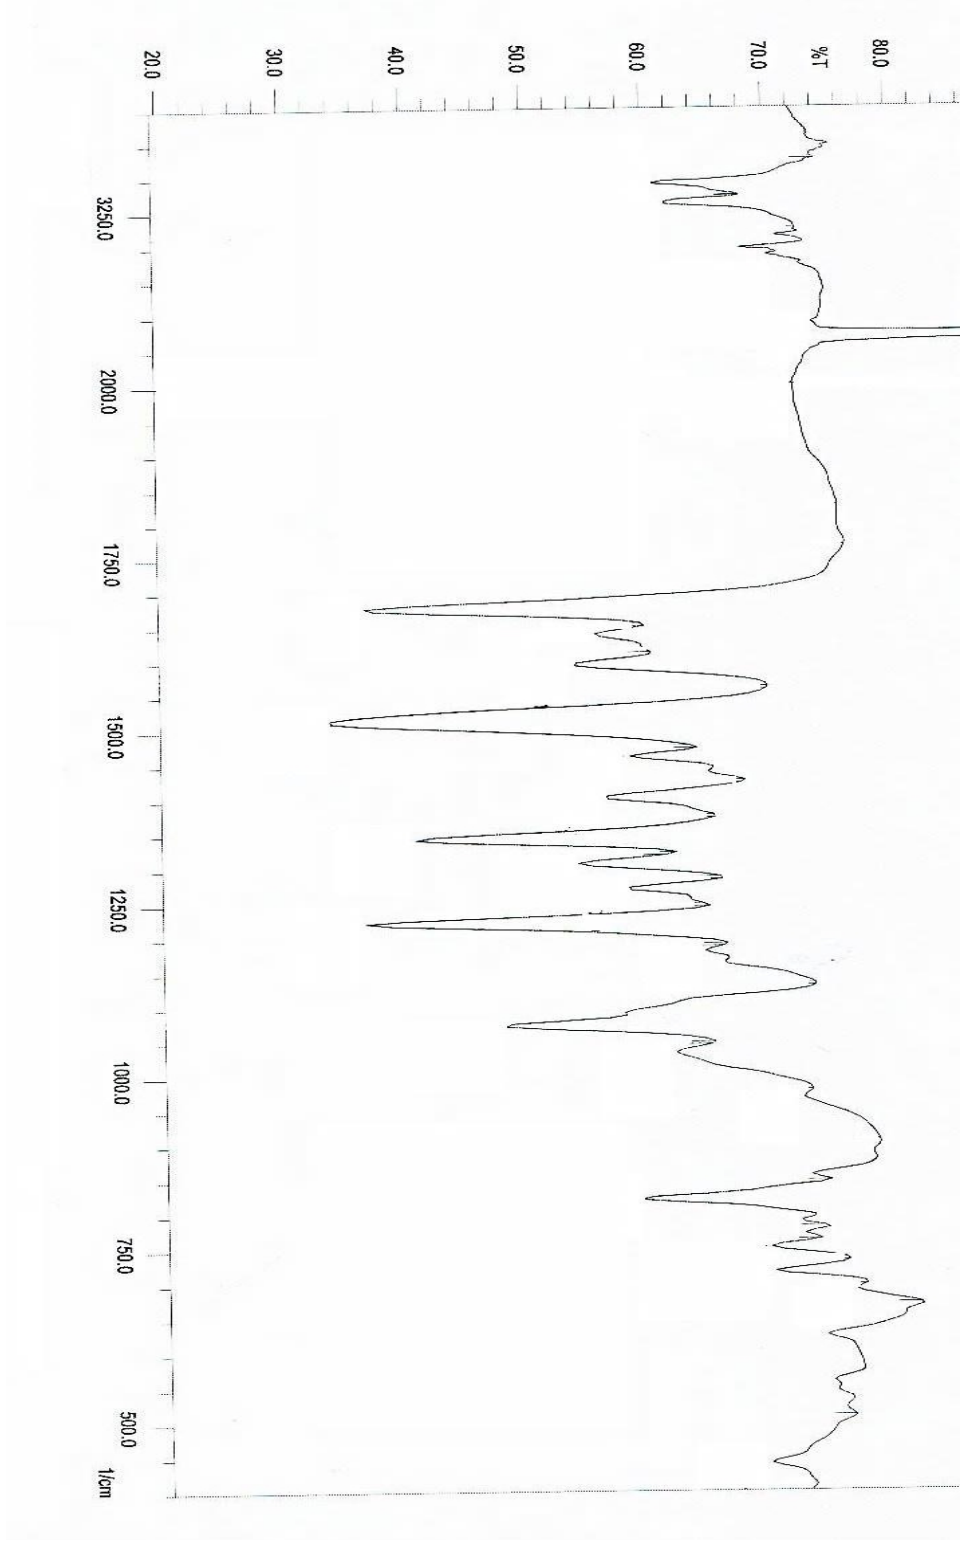

**Figure S6.** FT-IR spectrum of 7k

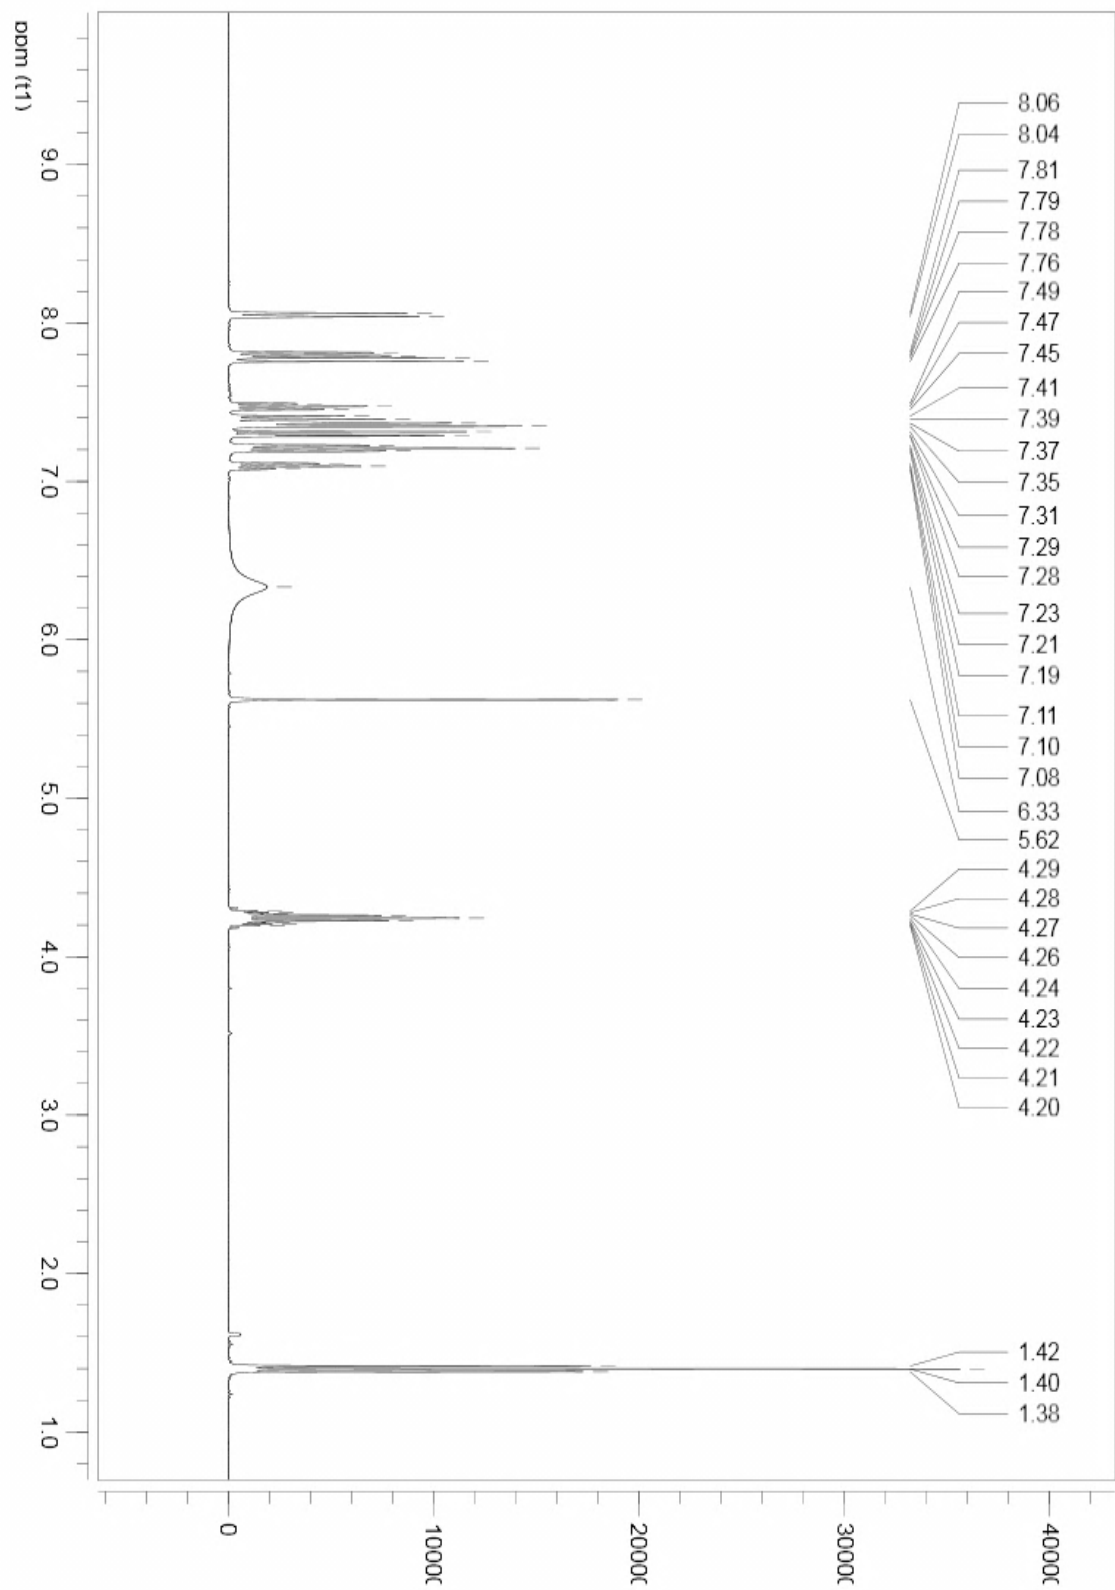

**Figure S7.**  $^1\text{H-NMR}$  spectrum of 7k

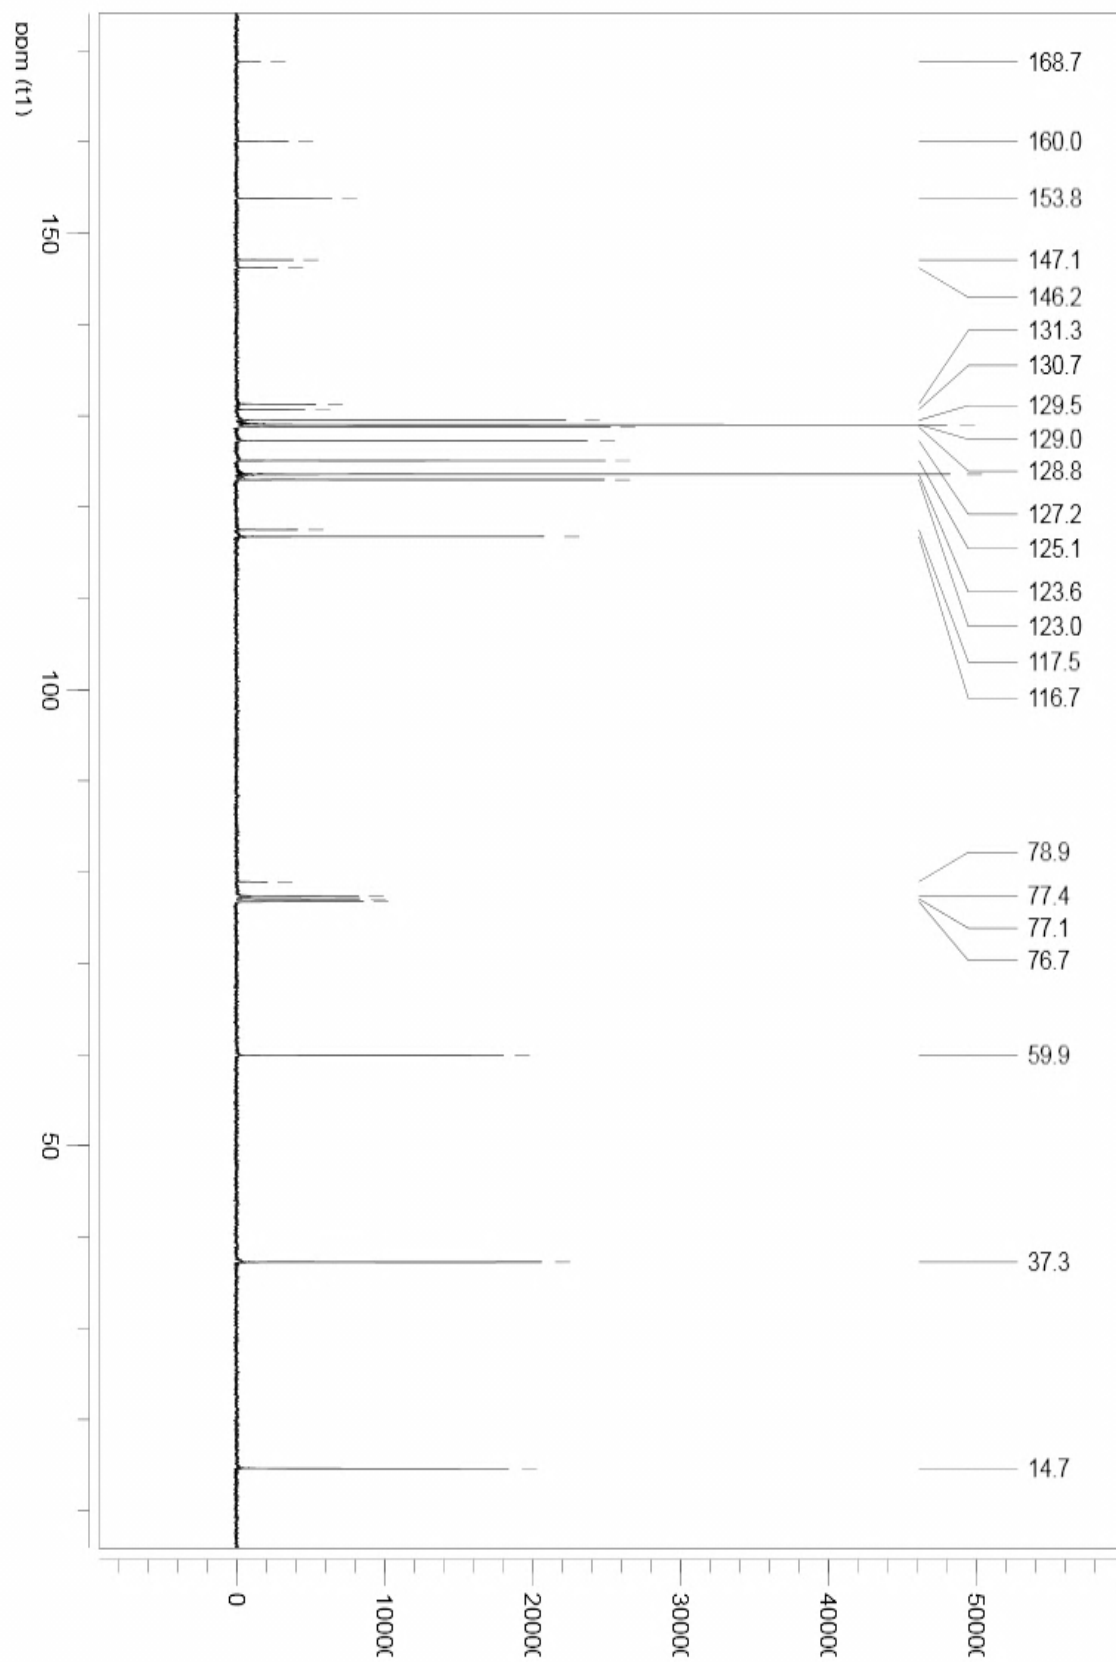

**Figure S8.**  $^{13}\text{C}$ -NMR spectrum of **7i**
